# Supplementary material for: A Comparison of In Vivo Bone Tissue Generation Using Calcium Phosphate Bone Substitutes in a Novel 3D Printed Four-Chamber Periosteal Bioreactor
Source: MDPI journal article supplement (doi:10.3390/bioengineering10101233), 2023-10-21
Supplement: s1 [file s1]

## Supplementary Figure

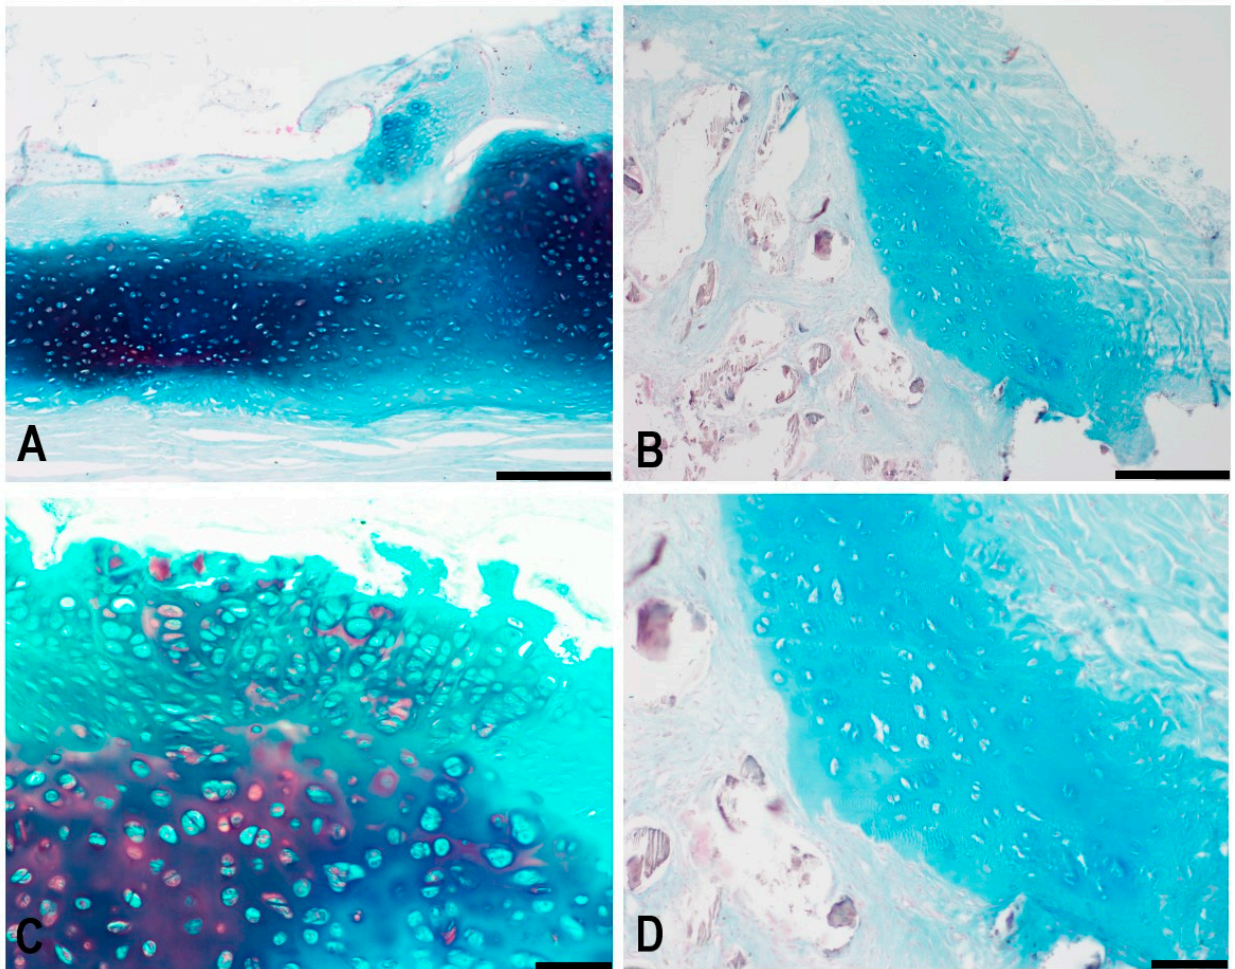

Supplementary Figure S1: Histological evaluation of neo-cartilage tissue formed within the autologous bone graft (A, C), and Zengro<sup>®</sup> (B, D) at 10-week post-implantation stained with Alcian Blue technique (pH 1). Scale bar: 200  $\mu$ m (A, B), and 100 (C, D). Blue colour determines the presence of cartilage tissue with the tissue.
